# Supplementary material for: The consistent behavior of negative Poisson's ratio with interlayer interactions
Source: Royal Society of Chemistry journal article supplement (doi:10.1039/d2ma00118g), 2022-01-01
Supplement: d2ma00118g1.pdf [file d2ma00118g1.pdf]

*Supplementary Information*

**The consistent behavior of negative Poisson's ratio with interlayer interactions**

Yancong Wang<sup>1</sup>, linfeng Yu<sup>1</sup>, Fa Zhang<sup>1,2</sup>, Qiang Chen<sup>1</sup>, Yuqi Zhan<sup>1</sup>, Lingwei Meng<sup>1</sup>, Xiong  
Zheng<sup>1,\*</sup>, Huimin Wang<sup>3,\*</sup>, Zhenzhen Qin<sup>4,\*</sup>, and Guangzhao Qin<sup>1,\*</sup>

<sup>1</sup>*State Key Laboratory of Advanced Design and Manufacturing for Vehicle Body, College of  
Mechanical and Vehicle Engineering, Hunan University, Changsha 410082, P. R. China*

<sup>2</sup>*State Key Laboratory of Robotics and System, Harbin Institute of Technology, Harbin 150001,  
People's Republic of China*

<sup>3</sup>*Hunan Key Laboratory for Micro-Nano Energy Materials & Device and School of Physics and  
Optoelectronics, Xiangtan University, Xiangtan 411105, Hunan, China*

<sup>4</sup>*School of Physics and Microelectronics, Zhengzhou University, Zhengzhou 450001, China*

## 1. On the fundamental mechanism

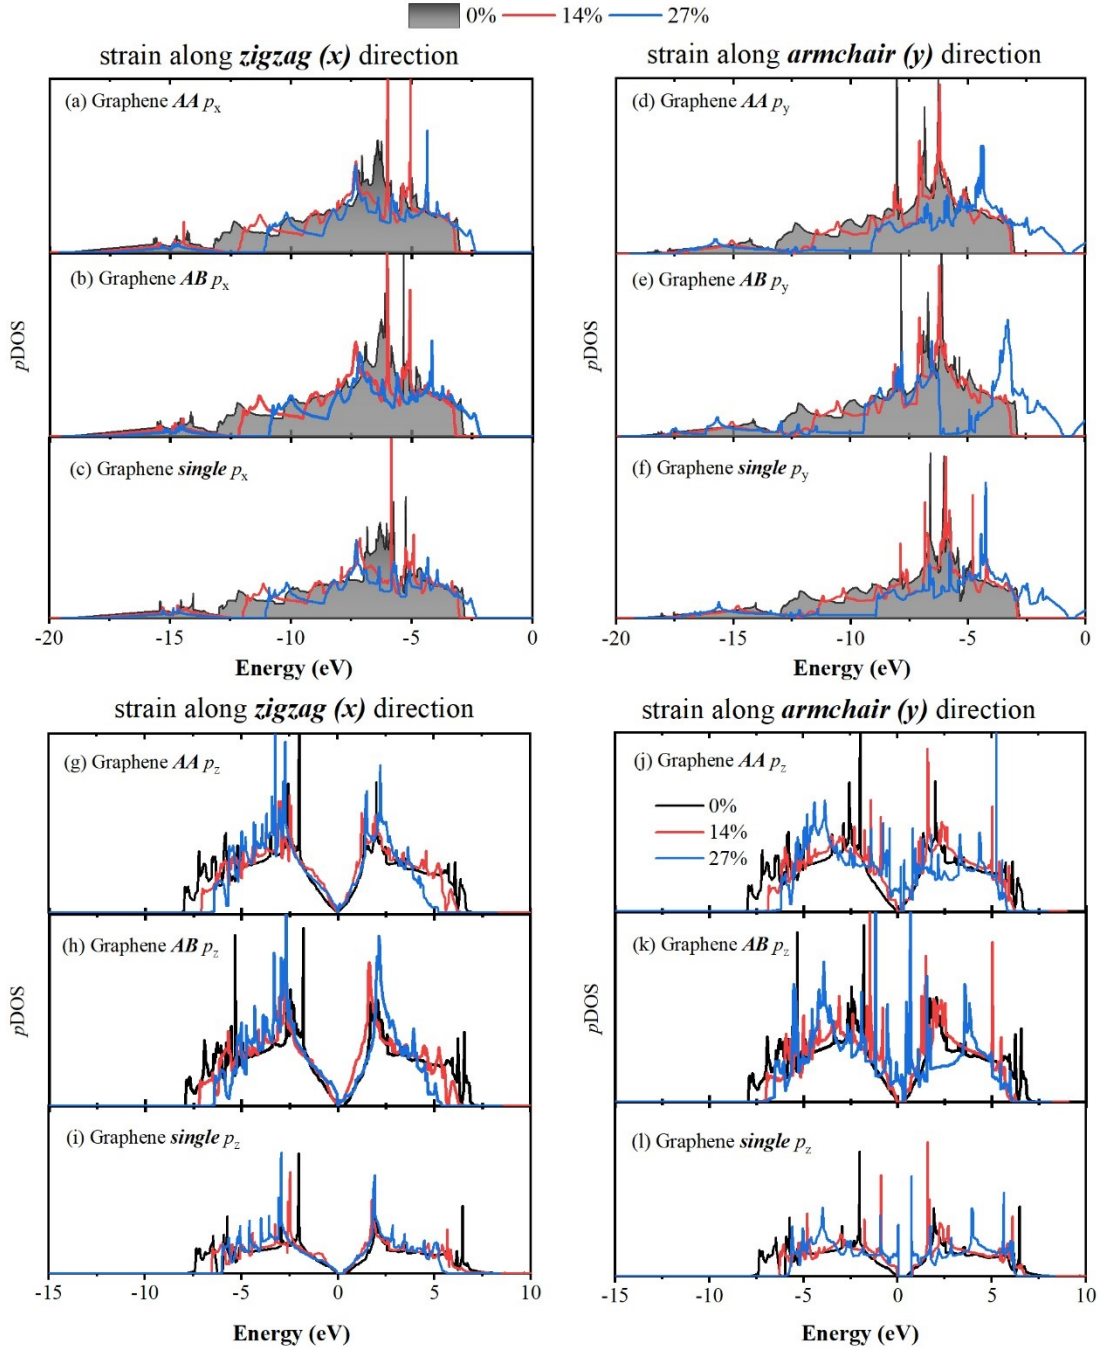

Figure S1: (a, b, c) The evolution of  $p_x$  when strain is applied along the zigzag direction (x). (d, e, f) The evolution of  $p_y$  when the strain is applied along the armchair direction (y). (g, h, i) The evolution of  $p_z$  when the strain is applied along the zigzag direction (x). (j, k, l) The evolution of  $p_z$  when the strain is applied along the armchair direction (y). (a, d, g, j), (b, e, h, k), and (c, f, i, l) illustrate the situation of AA bilayer, AB bilayer and single-layer graphene, respectively.

To get insight into the fundamental mechanism, we further study the evolution of orbital

projected density of states ( $pDOS$ ). It is well known that the C-C  $\sigma$  bonds come from the hybridized C-  $p_x/p_y$  orbitals, and the solo C-  $p_z$  orbital forms the  $\pi$  bonds and electronic Dirac cone.<sup>1</sup> Thus, we study  $p_x$ ,  $p_y$  and  $p_z$  for bilayer and single-layer graphene when strain is applied. As shown in Figure S1, it has almost same value and trend in some hybridized orbitals. When strain is applied along zigzag direction (x),  $p_x$  orbital decreased slightly then increased near the valance band maximum (VBM), which is almost same trend as  $p_y$  when strain is applied along the armchair direction (y). That's probably because the direction of orbitals is same as the direction of uniform strain applied. Moreover,  $p_z$  barely change near VBM during stretching. Thus, the different responses in orbital perpendicular to the direction of the strain applied cause different responses in NPR when strain is applied along zigzag and armchair direction.

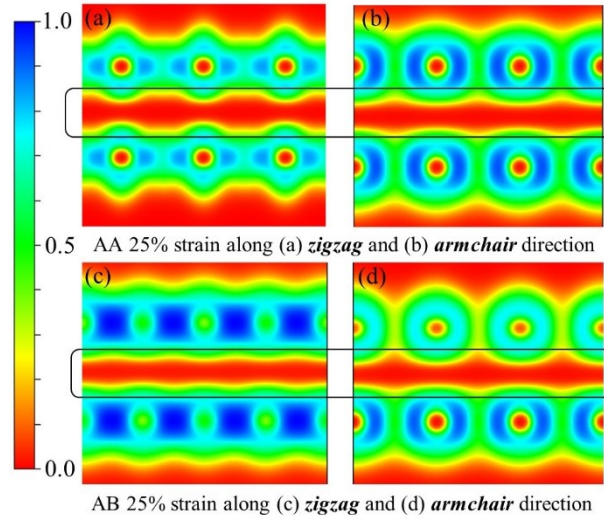

Figure S2: The evolution of the electronic localization functions (ELF) of (a, b) AA and (c, d) AB bilayer graphene when 25% strain is applied along (a, c) zigzag and (b, d) armchair direction, respectively. The areas framed by the black edges represent the interlayer position of AA and AB bilayer graphene.

As shown in Figure S2, there is low density of electrons in the interlayer position of AA and AB bilayer graphene probably because the electrons are restricted in in-plane area.<sup>2</sup> Thus, the interlayer interaction is weak and then have little effect on in-plane NPR, causing the consistency of bilayer and single-layer graphene. Furthermore, low density of electrons doesn't mean no electrons in the interlayer position of bilayer graphene. And these electrons unrestricted in 2D plane will slightly decrease the in-plane geometry variation on bilayer graphene.

## 2. Verification of the structural stability

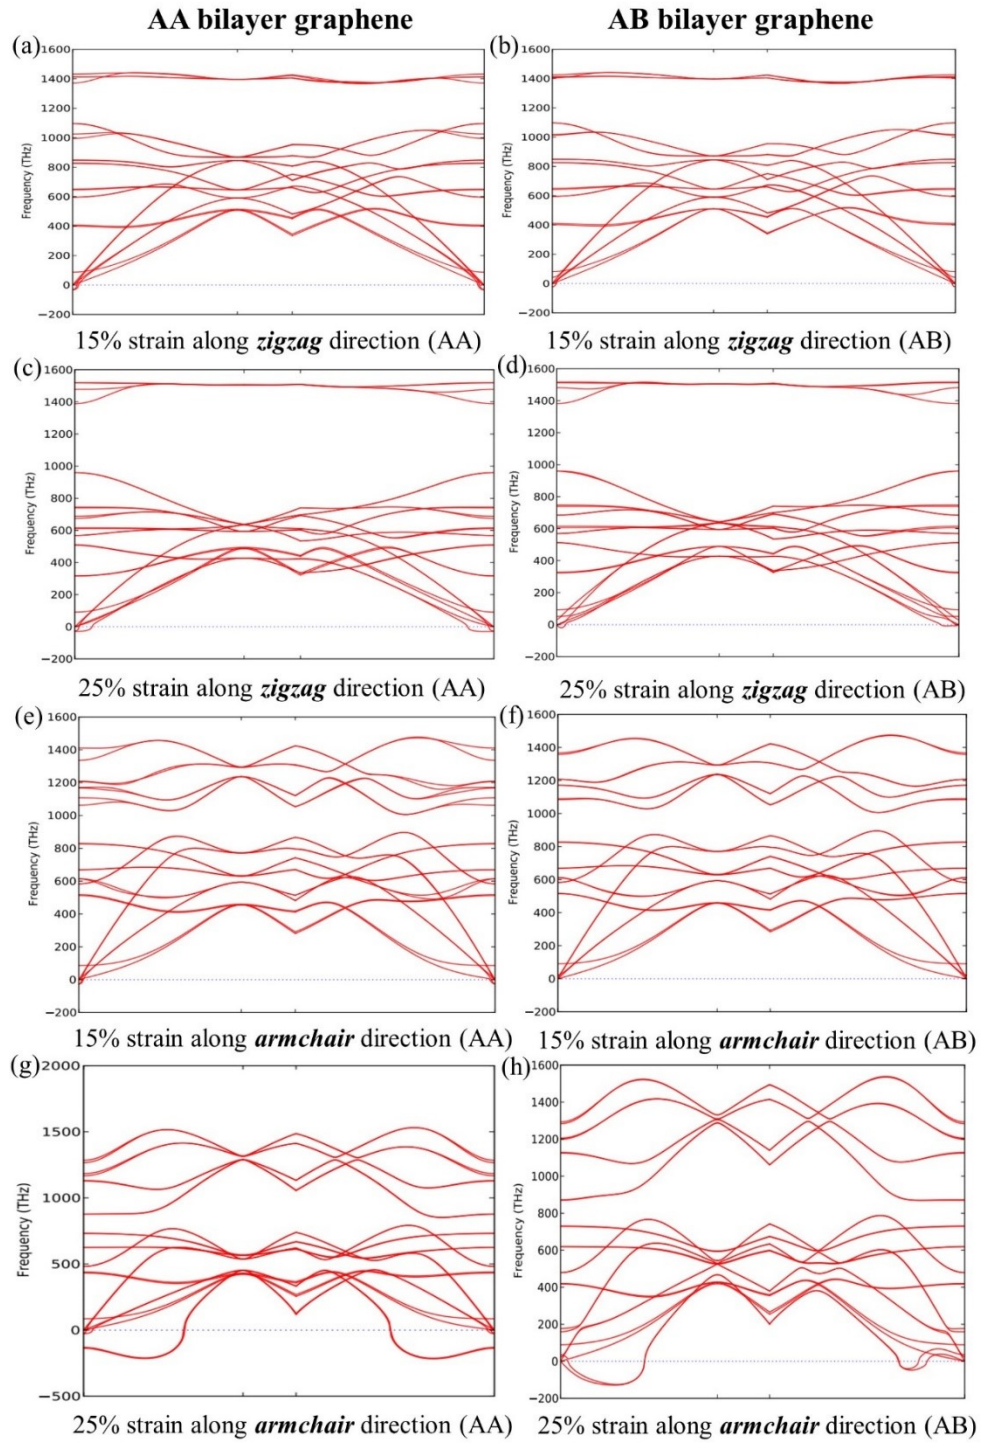

Figure S3: Phonon dispersions of (a, c, e, g) AA and (b, d, f, h) AB bilayer graphene when strain ((a, b, e, f) under 15% strain, (c, d, g, h) under 25% strain) is applied along (a, b, c, d) zigzag or (e, f, g, h) armchair direction, respectively.

We use phonon dispersions to verify the structural stability for AA and AB bilayer and single-layer graphene. As for single-layer graphene, it is the strongest material ever measured and it can sustain a large strain ( $\geq 25\%$ )<sup>3,4</sup>. However, the mode has become imaginary in single-layer graphene when 25% strain is applied along armchair direction<sup>1</sup>, as same as Fig. S3(g, h) in bilayer graphene under the same strain condition. Fig. S3 shows that AA and AB bilayer is stable when strain is applied along zigzag direction while the mode has become imaginary when strain near 25% is applied along armchair direction, probably because bilayer graphene structure break down near 30% strain is applied along armchair direction.

## Reference

- 1 Z. Qin, G. Qin and M. Hu, Origin of anisotropic negative Poisson's ratio in graphene, *Nanoscale*, 2018, **10**, 10365–10370.
- 2 T. Ohta, A. Bostwick, T. Seyller, K. Horn and E. Rotenberg, Controlling the Electronic Structure of Bilayer Graphene, *Science*, 2006, **313**, 951–954.
- 3 C. Lee, X. Wei, J. W. Kysar and J. Hone, Measurement of the elastic properties and intrinsic strength of monolayer graphene, *Science*, 2008, **321**, 385–388.
- 4 K. S. Kim, Y. Zhao, H. Jang, S. Y. Lee, J. M. Kim, K. S. Kim, J.-H. Ahn, P. Kim, J.-Y. Choi and B. H. Hong, Large-scale pattern growth of graphene films for stretchable transparent electrodes, *Nature*, 2009, **457**, 706–710.
